# Supplementary material for: Toward a Behavior Theory–Informed and User-Centered Mobile App for Parents to Prevent Infant Falls: Development and Usability Study
Source: PubMed Central journal article supplement (PMC8726019; doi:10.2196/29731), 2021-12-20
Supplement: pediatrics_v4i4e29731_app2.pdf [file pediatrics_v4i4e29731_app2.pdf]

Comprehension assessment (for use by researchers)

---

(Interviewer NB: Tell participant to use the app on their own taking as long as they need)

(Interviewer NB: Ask participant to inform you when they have finished going through the app and begin the following questions)

Total time taken to familiarize with the app :

|   | Question                                                                                                                  | Information Required                                                                                                                                                                                                           | Information located | Information understood |
|---|---------------------------------------------------------------------------------------------------------------------------|--------------------------------------------------------------------------------------------------------------------------------------------------------------------------------------------------------------------------------|---------------------|------------------------|
| 1 | What is the most common cause of infant injury in Australia                                                               | Falls                                                                                                                                                                                                                          |                     |                        |
| 2 | What is the body part most commonly injured due to a fall in infant                                                       | Head                                                                                                                                                                                                                           |                     |                        |
| 3 | What is the most important thing to do to prevent falls while feeding                                                     | Getting enough rest                                                                                                                                                                                                            |                     |                        |
| 4 | Name two things to do to make sure you will get enough rest with your baby that you can do <b>before the baby arrives</b> | Two out of<br>a. Talk to the doctor about baby blues<br>b. Make a sleep plan with partner/grandparents<br>c. Buy a breast pump<br>d. Not taking additional responsibilities                                                    |                     |                        |
| 5 | Name three things to do <b>with your baby</b> to make sure you get enough rest with your baby                             | Three out of<br>a. Utilize hospital nursery<br>b. Sleep when the baby sleeps<br>c. Ask for help<br>d. Buy a sling/baby carrier<br>e. Settle into routine<br>f. Take shortcuts around the house<br>g. Seek out sleep specialist |                     |                        |

|    |                                                                           |                                              |  |  |
|----|---------------------------------------------------------------------------|----------------------------------------------|--|--|
| 6  | What is the most possible reason for infant falling during breastfeeding  | Mother falling asleep while holding the baby |  |  |
| 7  | Name the 3-step method to follow during breastfeeding                     | Prepare position place                       |  |  |
| 8  | What is the best place to breastfeed when you are not tired               | Sitting in a comfortable chair               |  |  |
| 9  | Why it is risky to feed sitting if you are tired                          | Risk of SIDS and falls                       |  |  |
| 10 | What is more safer place to breastfeed if you are tired                   | Bed/middle of the bed                        |  |  |
| 11 | What is the best place for the baby to sleep after a feed                 | Cot                                          |  |  |
| 12 | Why you should not leave baby alone on a bed when or after bottle-feeding | Risk of rolling down                         |  |  |
