# Supplementary material for: Toward a Behavior Theory–Informed and User-Centered Mobile App for Parents to Prevent Infant Falls: Development and Usability Study
Source: PubMed Central journal article supplement (PMC8726019; doi:10.2196/29731), 2021-12-20
Supplement: pediatrics_v4i4e29731_app3.pdf [file pediatrics_v4i4e29731_app3.pdf]

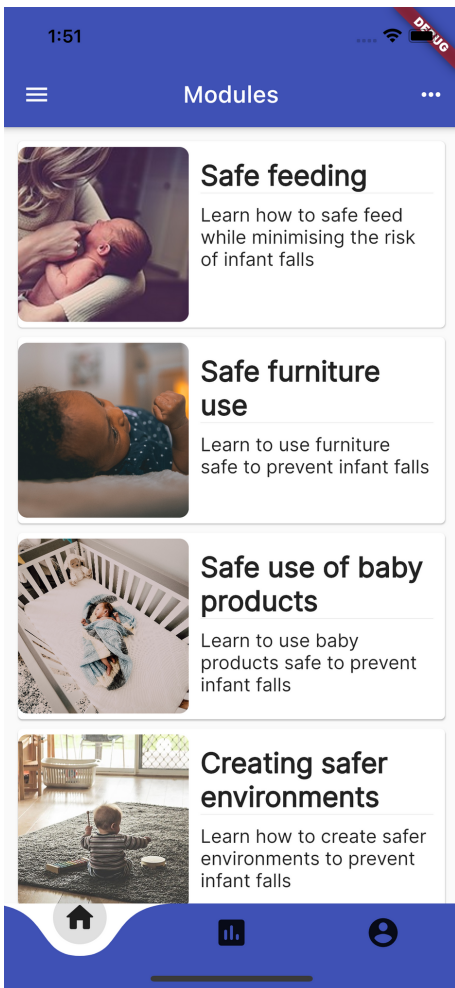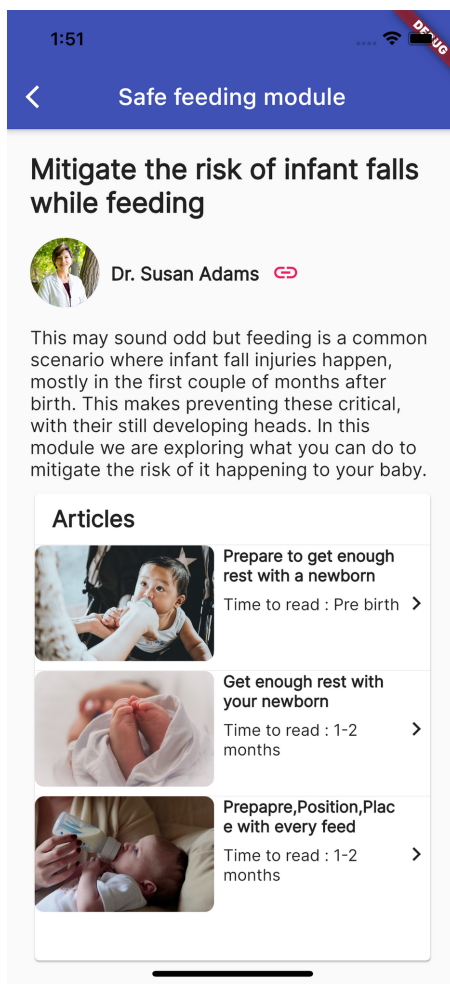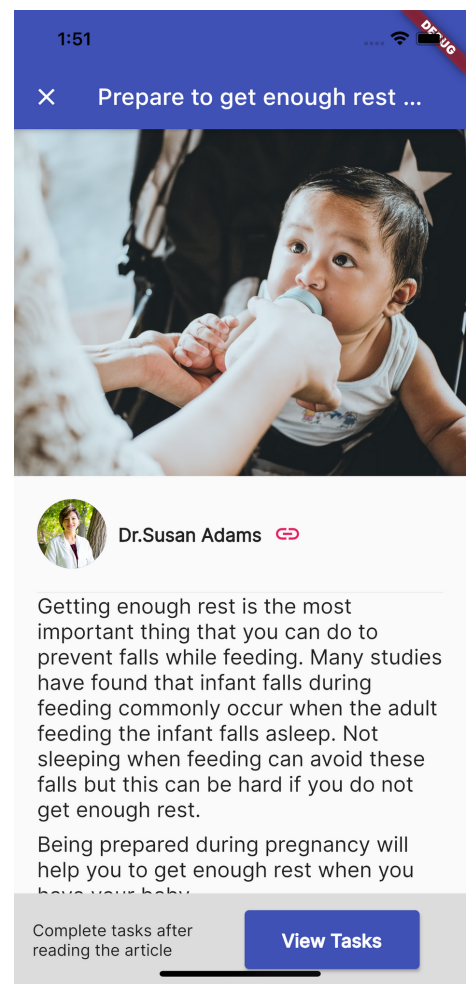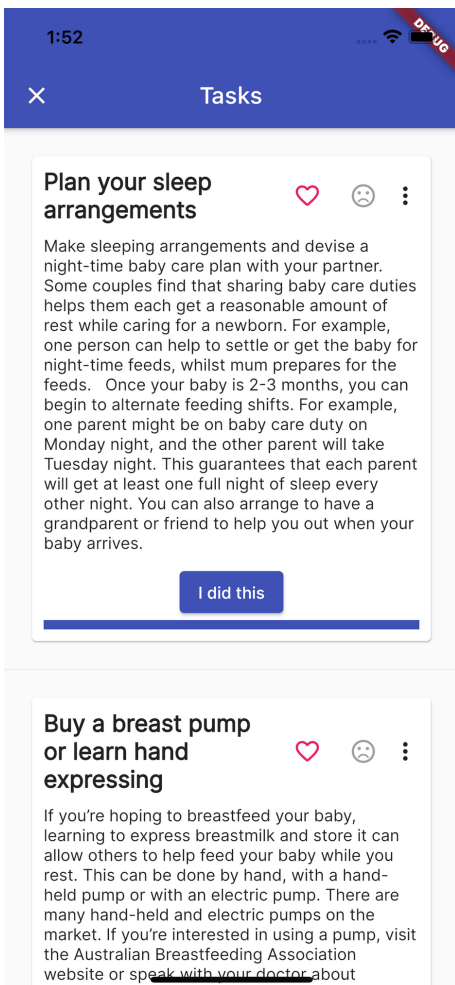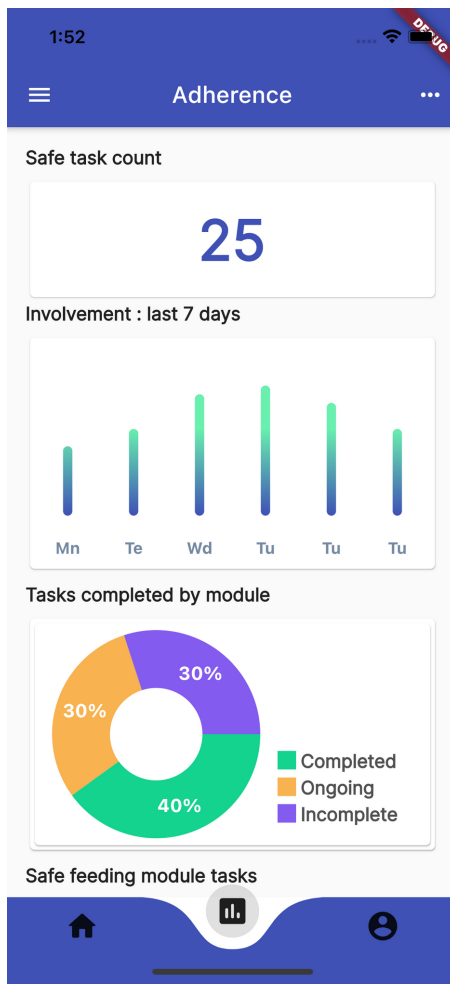

## App screens

1. Home screen
2. Module home
3. Articles
4. Actions/tasks screen
5. Task adherence screen

(Note that there are from a beta release, not the final application)
